# Supplementary material for: Oleic Acid-Based Self Micro-Emulsifying Delivery System for Enhancing Antifungal Activities of Clotrimazole
Source: MDPI journal article supplement (doi:10.3390/pharmaceutics14030478), 2022-02-22
Supplement: s1 [file s1]

# Oleic Acid-Based Self Micro-Emulsifying Delivery System for Enhancing Antifungal Activities of Clotrimazole

Ting-Lun Yang <sup>1</sup>, Chien-Ming Hsieh <sup>2</sup>, Ling-Jei Meng <sup>1</sup>, Tsuimin Tsai <sup>3</sup> and Chin-Tin Chen <sup>1,\*</sup>

<sup>1</sup> Department of Biochemical Science and Technology, College of Life Science, National Taiwan University, Taipei 106, Taiwan; f05b22054@ntu.edu.tw (T.-L.Y.); r08b22021@ntu.edu.tw (L.-J.M.)

<sup>2</sup> School of Pharmacy, College of Pharmacy, Taipei Medical University, Taipei 110, Taiwan; cmhsieh@tmu.edu.tw

<sup>3</sup> FormuRx Pharmaceuticals Co. Ltd., Taipei 10617, Taiwan; tmtsai00@gmail.com

\* Correspondence: chintin@ntu.edu.tw; Tel.: +886-2-3366-9487; Fax: +886-2-3366-2271

## *C. albicans*

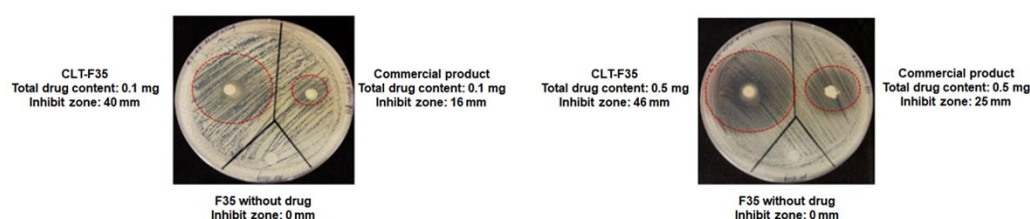

## Fluconazole-resistant *C. albicans*

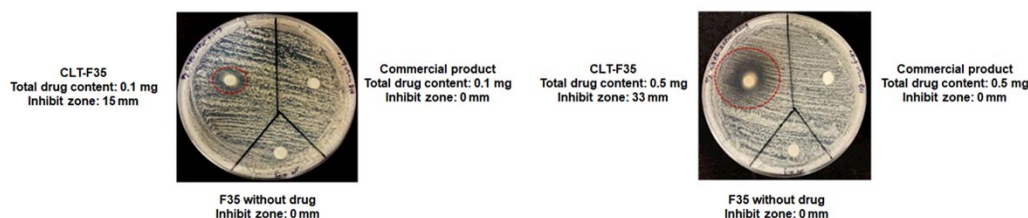

**Figure S1.** Representative plate of disk diffusion assay showing inhibition zones against wild-type and fluconazole resistant *C. albicans* by F35 loading with or without CLT and commercial CLT cream, Mycosten®. After inoculating  $2 \times 10^6$  CFU/mL of wild-type and fluconazole-resistant *C. albicans* on RPMI 1640 medium, each group was treated with F35 and Mycosten® containing 0.1 mg or 0.5 mg CLT, then incubate at 37 °C for 48 h.

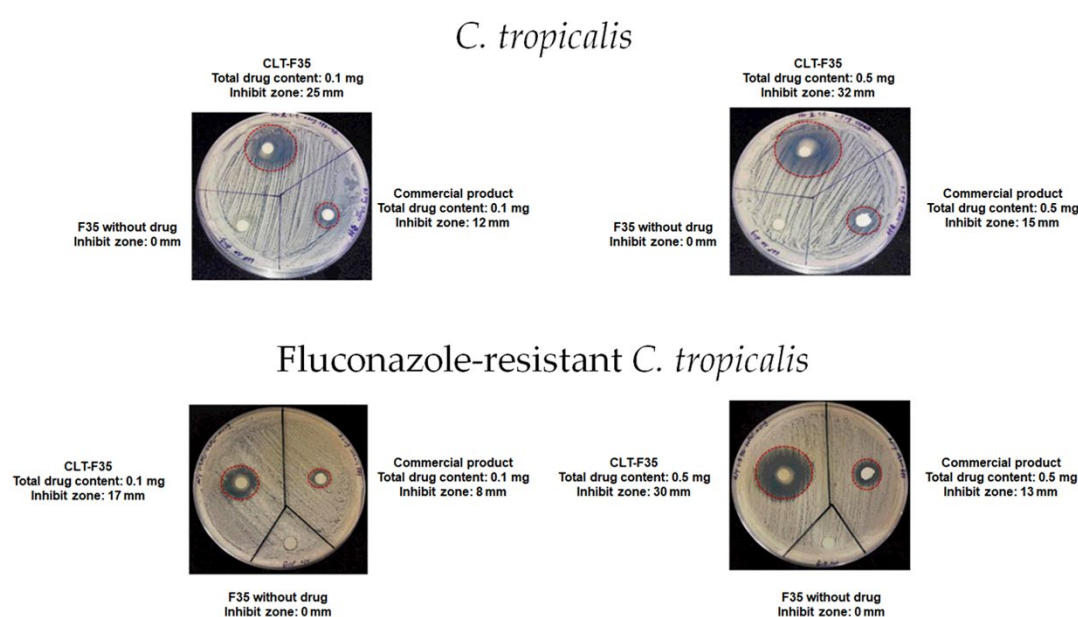

**Figure S2.** Representative plate of disk diffusion assay showing inhibition zones against wild-type and fluconazole resistant *C. tropicalis* by F35 loading with or without CLT and commercial CLT cream, Mycosten®. After inoculating  $2 \times 10^6$  CFU/mL of wild-type and fluconazole-resistant *C. tropicalis* on RPMI 1640 medium, each group was treated with F35 and Mycosten® containing 0.1 mg or 0.5 mg CLT, then incubate at 37°C for 48 h.

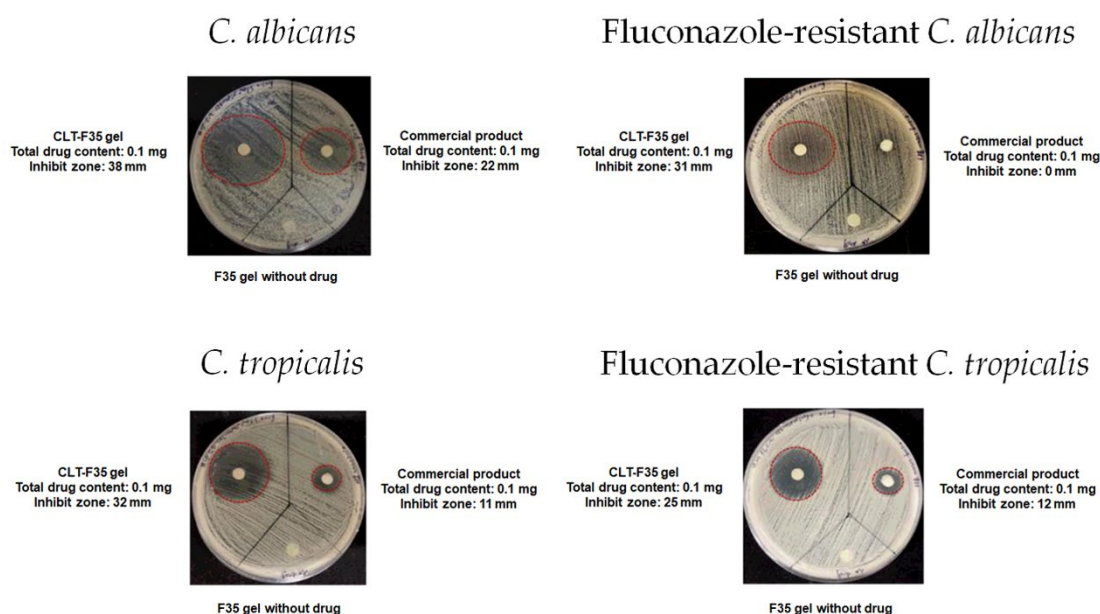

**Figure S3.** Representative plate of disk diffusion assay showing inhibition zones against wild-type and fluconazole resistant *C. albicans* and *C. tropicalis* by F35 gel loading with or without 0.1 mg CLT and commercial CLT cream, Mycosten®. After inoculating  $2 \times 10^6$  CFU/mL of *C. albicans*, fluconazole-resistant *C. albicans*, *C. tropicalis* and fluconazole-resistant *C. tropicalis* on RPMI 1640 medium, each group was treated with F35 gel and Mycosten® containing 0.1 mg CLT, then incubate at 37 °C for 48 h.
